# Supplementary material for: Halo-phenolic metabolites and their in vitro antioxidant and cytotoxic activities from the Red Sea alga Avrainvillea amadelpha
Source: publisher site journal article supplement (doi:10.1515/znc-2020-0221), 2021-02-01

## Supplementary material

### Cytotoxic activity (screening)

**Table S1.** Cytotoxic activity of the *A. amadelpa* extract and compounds **1-3** and **5**

| Sample   | Cytotoxic activity          |                             |                             |                             |                             |
|----------|-----------------------------|-----------------------------|-----------------------------|-----------------------------|-----------------------------|
|          | MCF-7                       | DU-145                      | HeLa                        | Panc-1                      | Skov-3                      |
|          | % Viability<br>(10 $\mu$ M) |
| Extract* | 28.53                       | 26.91                       | 10.41                       | 50.14                       | 81.57                       |
| <b>1</b> | 58.89                       | 40.17                       | 40.92                       | 97.16                       | 81.24                       |
| <b>2</b> | 36.88                       | 35.73                       | 46.38                       | 100.08                      | 73.31                       |
| <b>3</b> | 78.96                       | 38.26                       | 37.31                       | 98.20                       | 69.87                       |
| <b>5</b> | 96.50                       | 33.10                       | 32.42                       | 95.56                       | 60.30                       |

\* The viability% of the extract was measured at 100  $\mu$ g/mL.

**Table S2.** 1D-NMR spectral data of compounds **3 – 6** in  $CD_3OD$

| C/H | <b>3</b> |              |          | <b>4*</b> |                    |          | <b>5</b> |                    |          | <b>6</b> |                    |          |
|-----|----------|--------------|----------|-----------|--------------------|----------|----------|--------------------|----------|----------|--------------------|----------|
|     | $^{13}C$ | $^1H$        | $J_{Hz}$ | $^{13}C$  | $^1H$              | $J_{Hz}$ | $^{13}C$ | $^1H$              | $J_{Hz}$ | $^{13}C$ | $^1H$              | $J_{Hz}$ |
| 1   | 129.3    |              |          | 129.8     |                    |          | 130.5    |                    |          | 129.6    |                    |          |
| 2   | 132.5    | 7.74, d, 8.5 |          | 130.6     | 7.75, dd, 1.8, 8.4 |          | 131.4    | 7.79, dd, 1.8, 8.4 |          | 128.7    | 7.79, dd, 1.6, 8.4 |          |
| 3   | 116.5    | 6.88, d, 8.5 |          | 115.9     | 7.03, d, 8.4       |          | 114.3    | 6.97, d, 8.4       |          | 114.7    | 6.88, d, 8.4       |          |
| 4   | 164.1    |              |          | 160.4     |                    |          | 162.6    |                    |          | 156.4    |                    |          |
| 5   | 116.5    | 6.88, d, 8.5 |          | 110.4     |                    |          | 83.7     |                    |          | 108.6    |                    |          |
| 6   | 132.5    | 7.74, d, 8.5 |          | 134.7     | 8.04, d, 1.8       |          | 141.3    | 8.26, d, 1.8       |          | 134.3    | 8.10, d, 1.6       |          |
| 7   | 191.2    | 9.75, s      |          | 190.1     | 9.75, s            |          | 190.0    | 9.73, s            |          | 172.1    |                    |          |

\* NMR spectral data of compound **4** in DMSO

## **Spectral data**

**Figure S1:**  $^1\text{H}$ -NMR spectrum of compound **1** in  $\text{CD}_3\text{OD}$

**Figure S2:** HH-COSY NMR spectrum of compound **1** in  $\text{CD}_3\text{OD}$

**Figure S3:**  $^{13}\text{C}$ -NMR spectrum of compound **1** in  $\text{CD}_3\text{OD}$

**Figure S4:**  $^{13}\text{C}$ -DEPT-135 NMR spectrum of compound **1** in  $\text{CD}_3\text{OD}$

**Figure S5:** HSQC NMR spectrum of compound **1** in  $\text{CD}_3\text{OD}$

**Figure S6:** HMBC NMR spectrum of compound **1** in  $\text{CD}_3\text{OD}$

**Figure S7:** HMBC NMR spectrum ( $\delta_{\text{H}}$  9.7-6.5 and  $\delta_{\text{C}}$  80-200) of compound **1** in  $\text{CD}_3\text{OD}$

**Figure S8:** (-) ESI-MS spectrum of compound **1**

**Figure S9:**  $^1\text{H}$ -NMR spectrum of compound **2** in  $\text{CD}_3\text{OD}$

**Figure S10:**  $^{13}\text{C}$ -NMR spectrum of compound **2** in  $\text{CD}_3\text{OD}$

**Figure S11:** HSQC NMR spectrum of compound **2** in  $\text{CD}_3\text{OD}$

**Figure S12:** HMBC NMR spectrum of compound **2** in  $\text{CD}_3\text{OD}$

**Figure S13:** EI-MS spectrum of compound **2**

**Figure S14:**  $^1\text{H}$ -NMR spectrum of compound **3** in  $\text{CD}_3\text{OD}$

**Figure S15:** HH-COSY NMR spectrum of compound **3** in  $\text{CD}_3\text{OD}$

**Figure S16:**  $^{13}\text{C}$ -NMR spectrum of compound **3** in  $\text{CD}_3\text{OD}$

**Figure S17:**  $^{13}\text{C}$ -DEPT-135 NMR spectrum of compound **3** in  $\text{CD}_3\text{OD}$

**Figure S18:** HSQC NMR spectrum of compound **3** in  $\text{CD}_3\text{OD}$

**Figure S19:** HMBC NMR spectrum of compound **3** in  $\text{CD}_3\text{OD}$

**Figure S20:** EI-MS spectrum of compound **3**

## Compound 1

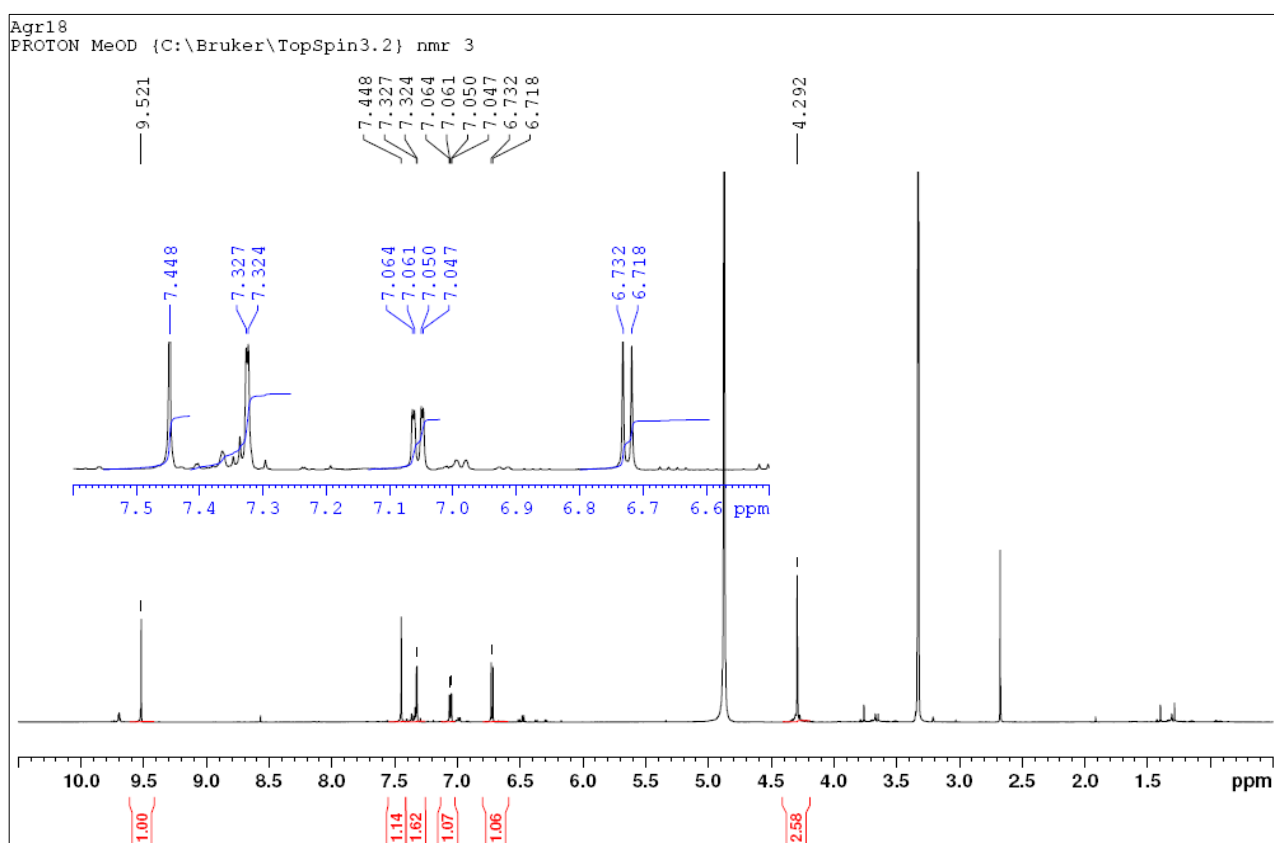

Fig. S1:  $^1\text{H}$ -NMR spectrum of compound **1** in  $\text{CD}_3\text{OD}$

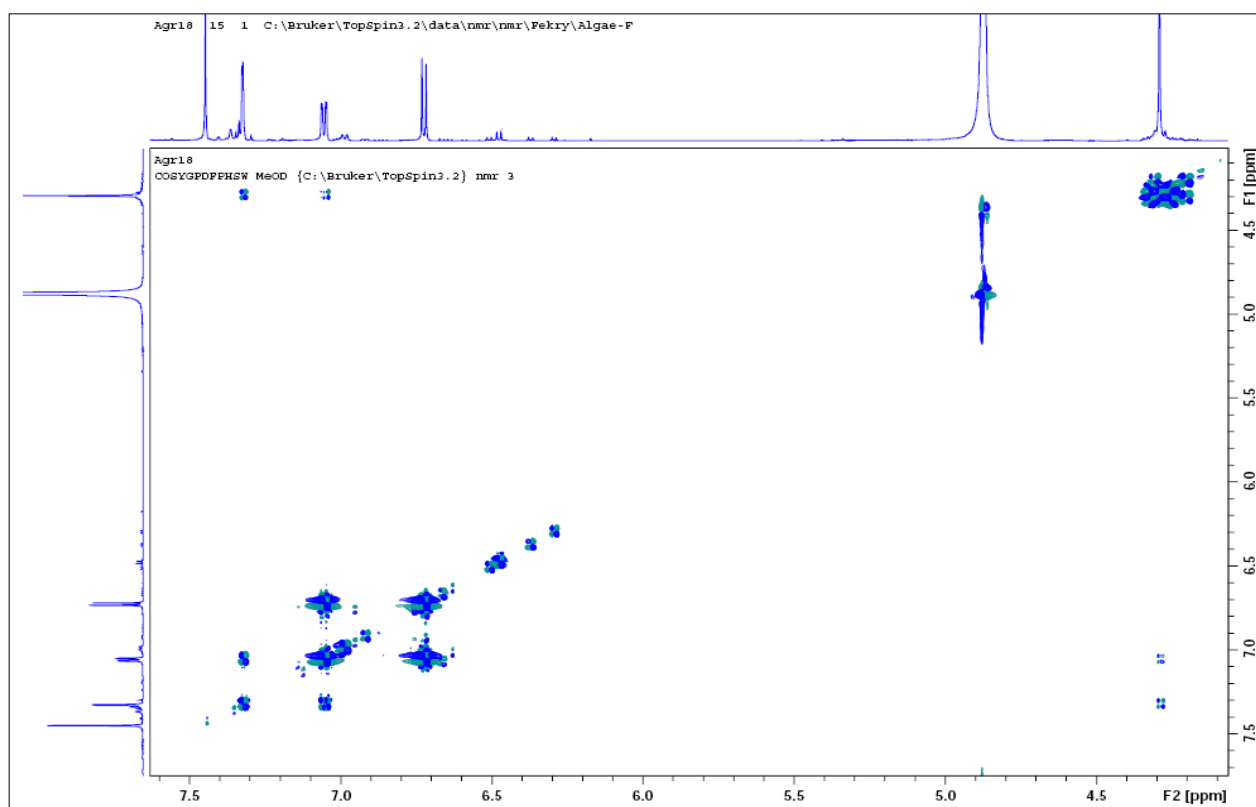

Fig. S2: HH-COSY NMR spectrum of compound **1** in  $\text{CD}_3\text{OD}$

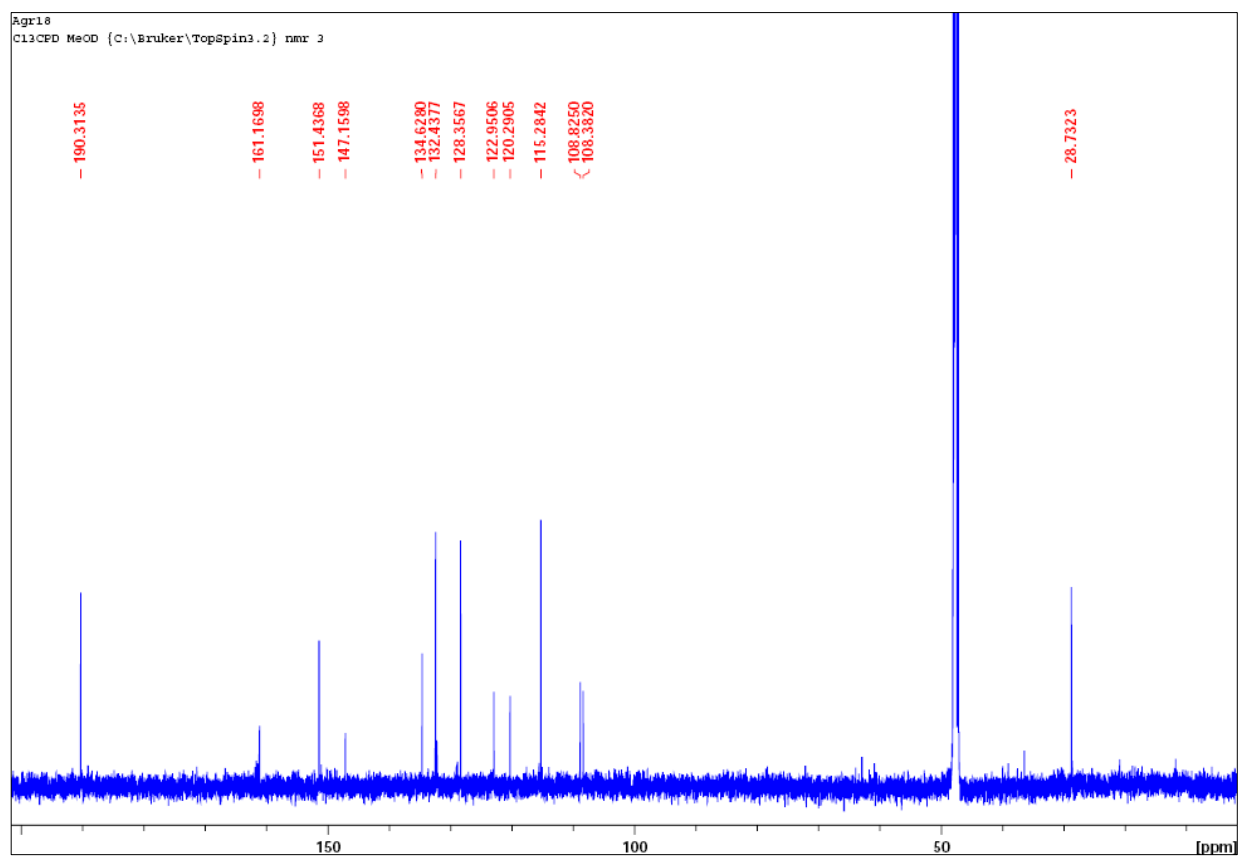

**Fig. S3:**  $^{13}\text{C}$ -NMR spectrum of compound **1** in  $\text{CD}_3\text{OD}$

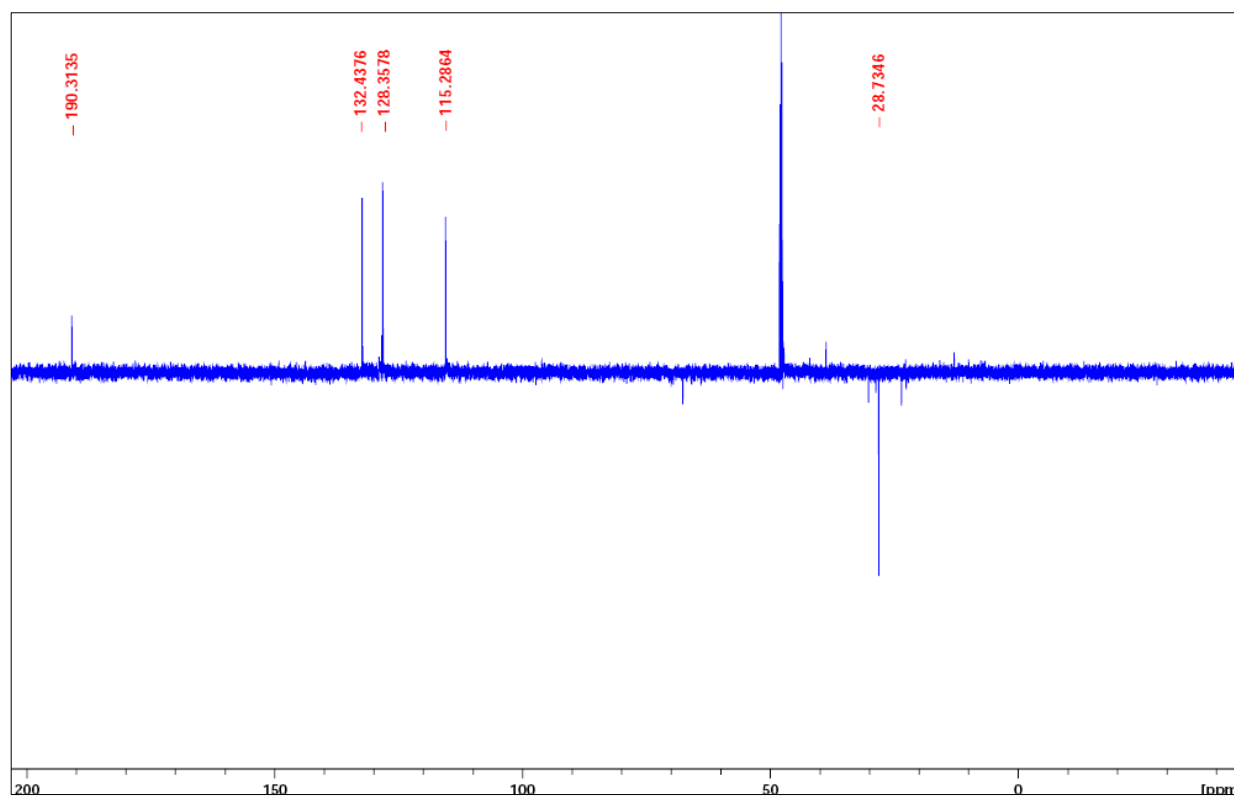

**Fig. S4:**  $^{13}\text{C}$ -DEPT135 NMR spectrum of compound **1** in  $\text{CD}_3\text{OD}$

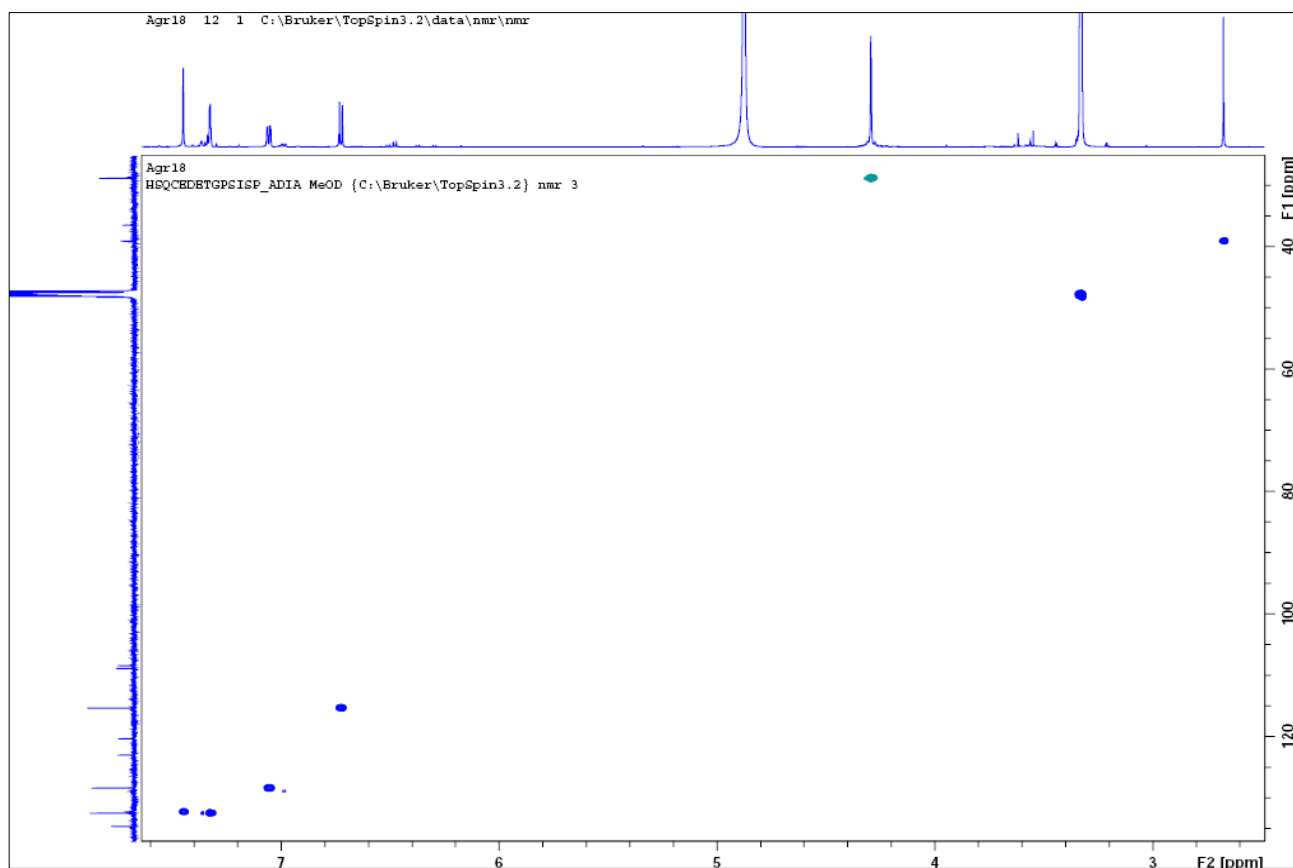

**Fig. S5:** HSQC NMR spectrum of compound **1** in CD<sub>3</sub>OD

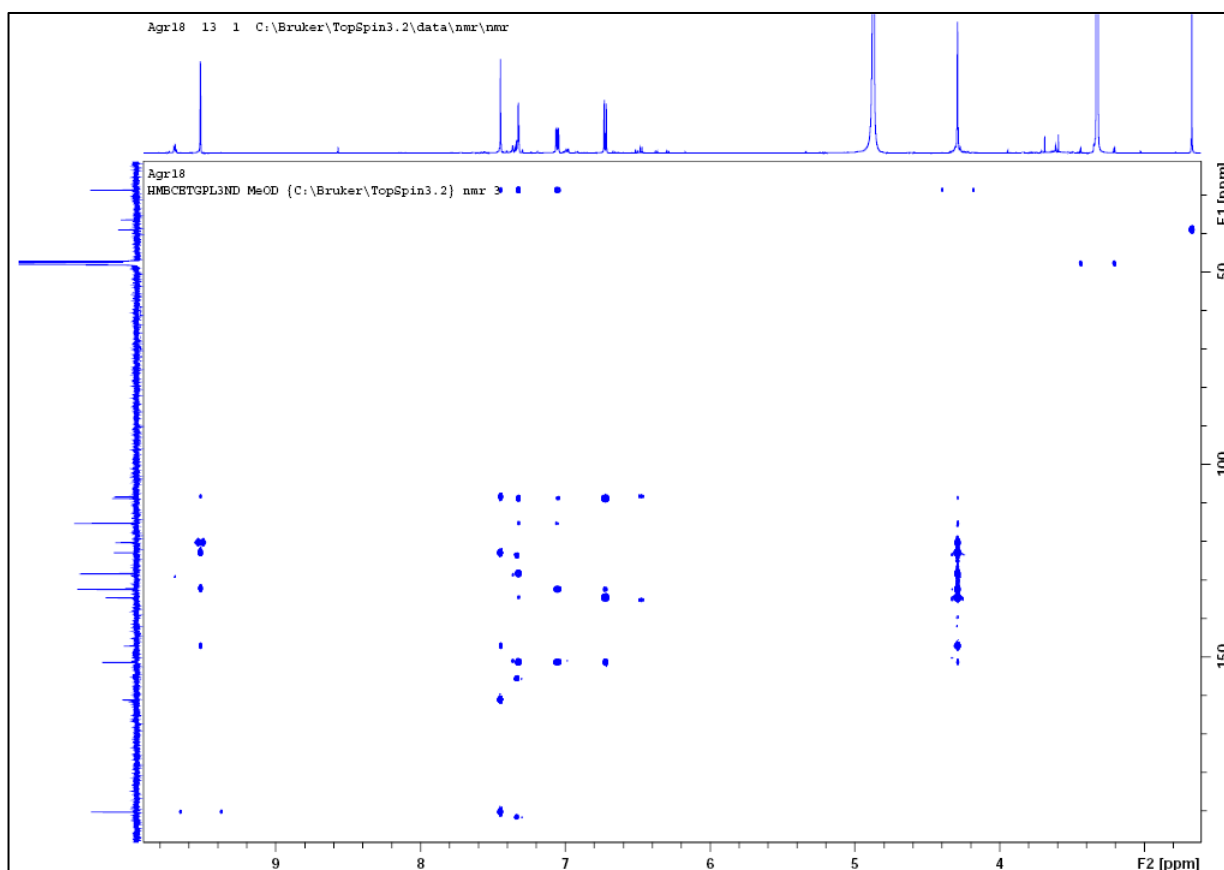

**Fig. S6:** HMBC NMR spectrum of compound **1** in CD<sub>3</sub>OD

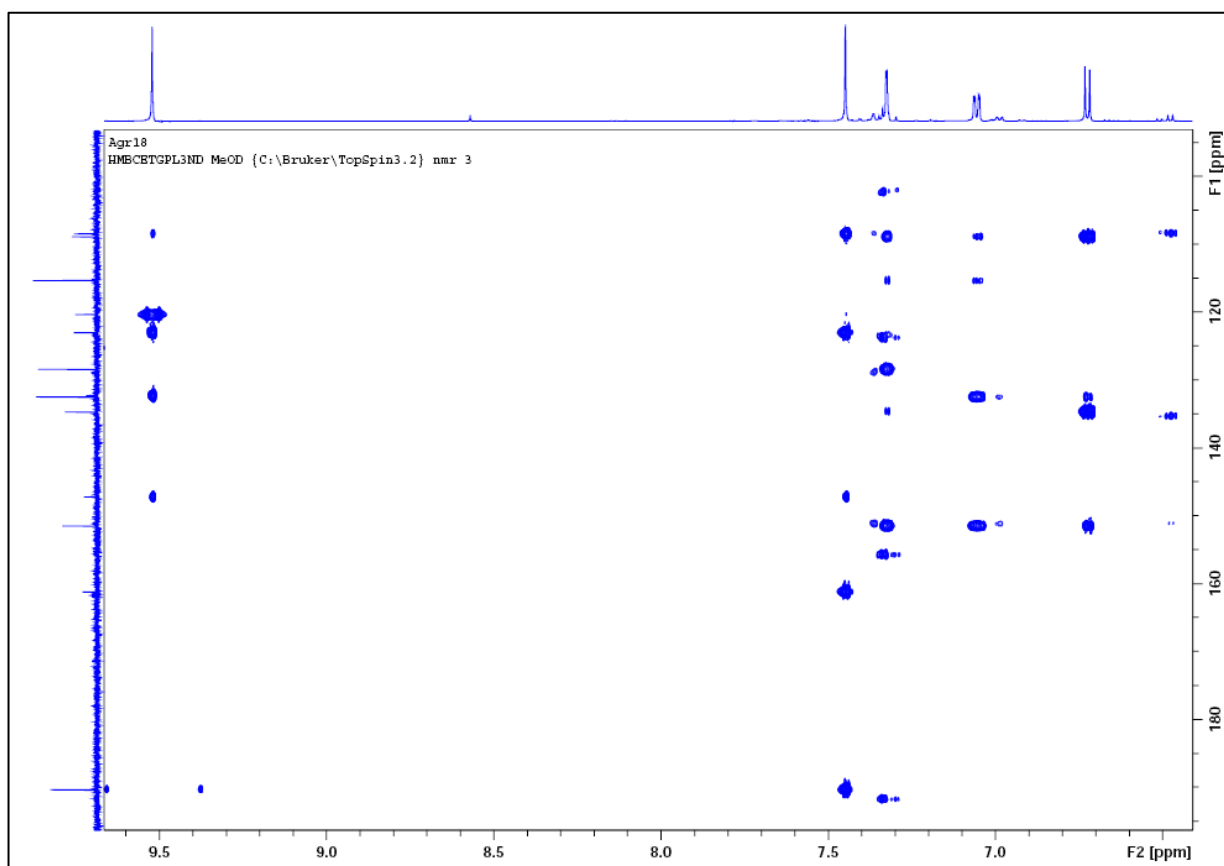

**Fig. S7:** HMBC NMR spectrum ( $\delta_{\text{H}}$  9.7-6.5 and  $\delta_{\text{C}}$  80-200) of compound **1** in CD<sub>3</sub>OD

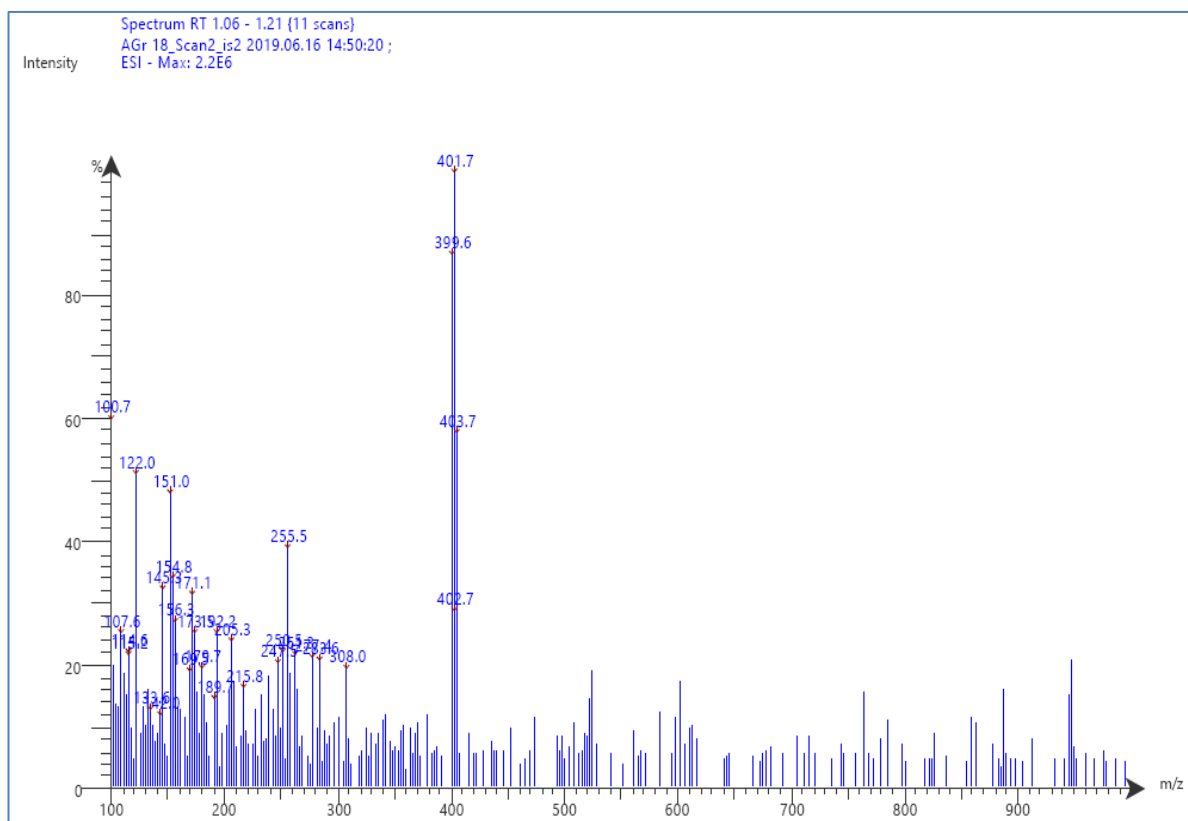

**Figure S8:** (-) ESI-MS spectrum of compound **1**

## Compound 2

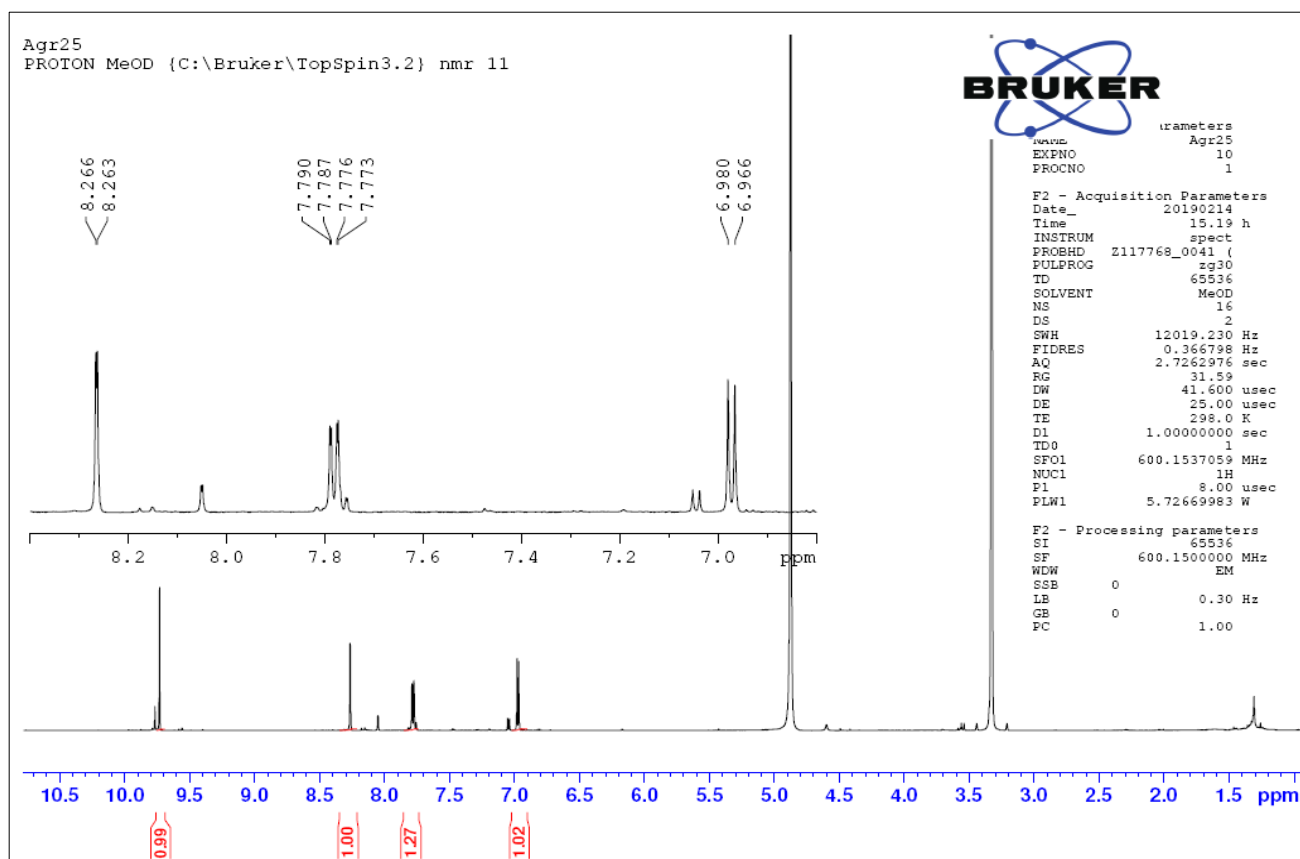

Fig. S9:  $^1\text{H}$ -NMR spectrum of compound 2 in  $\text{CD}_3\text{OD}$

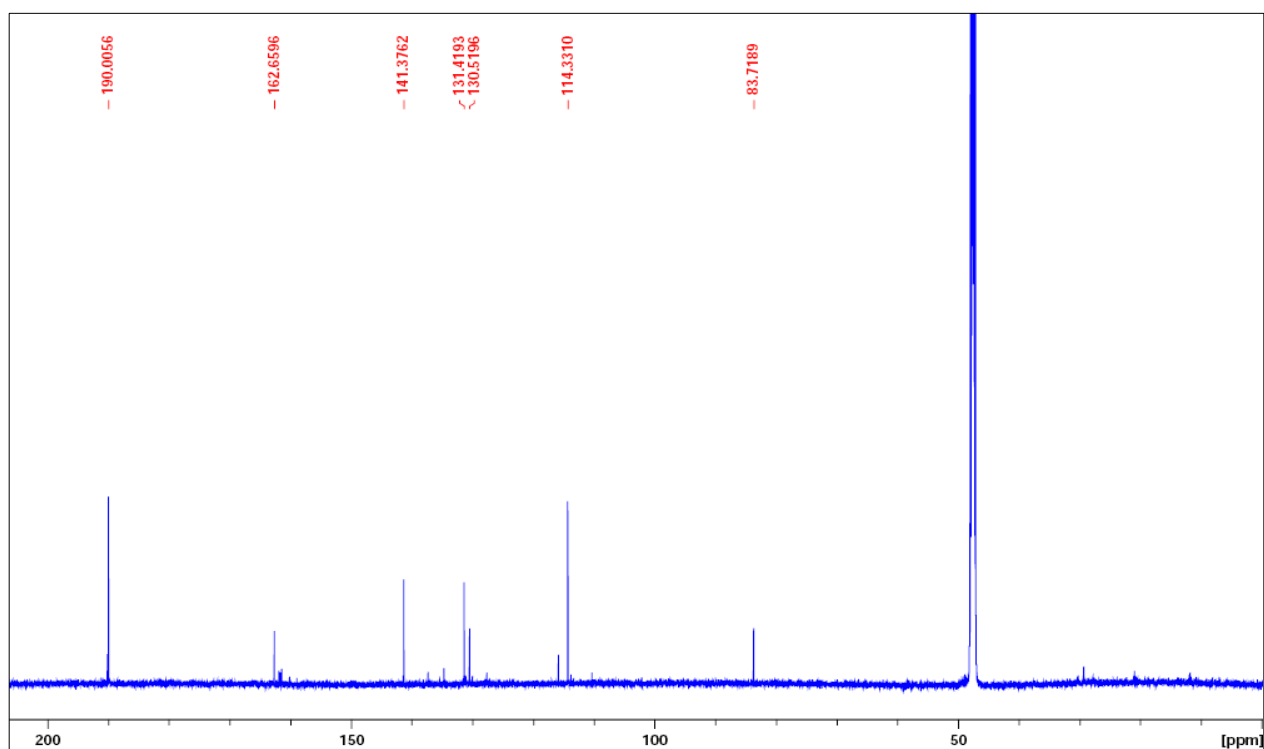

Fig. S10:  $^{13}\text{C}$ -NMR spectrum of compound 2 in  $\text{CD}_3\text{OD}$

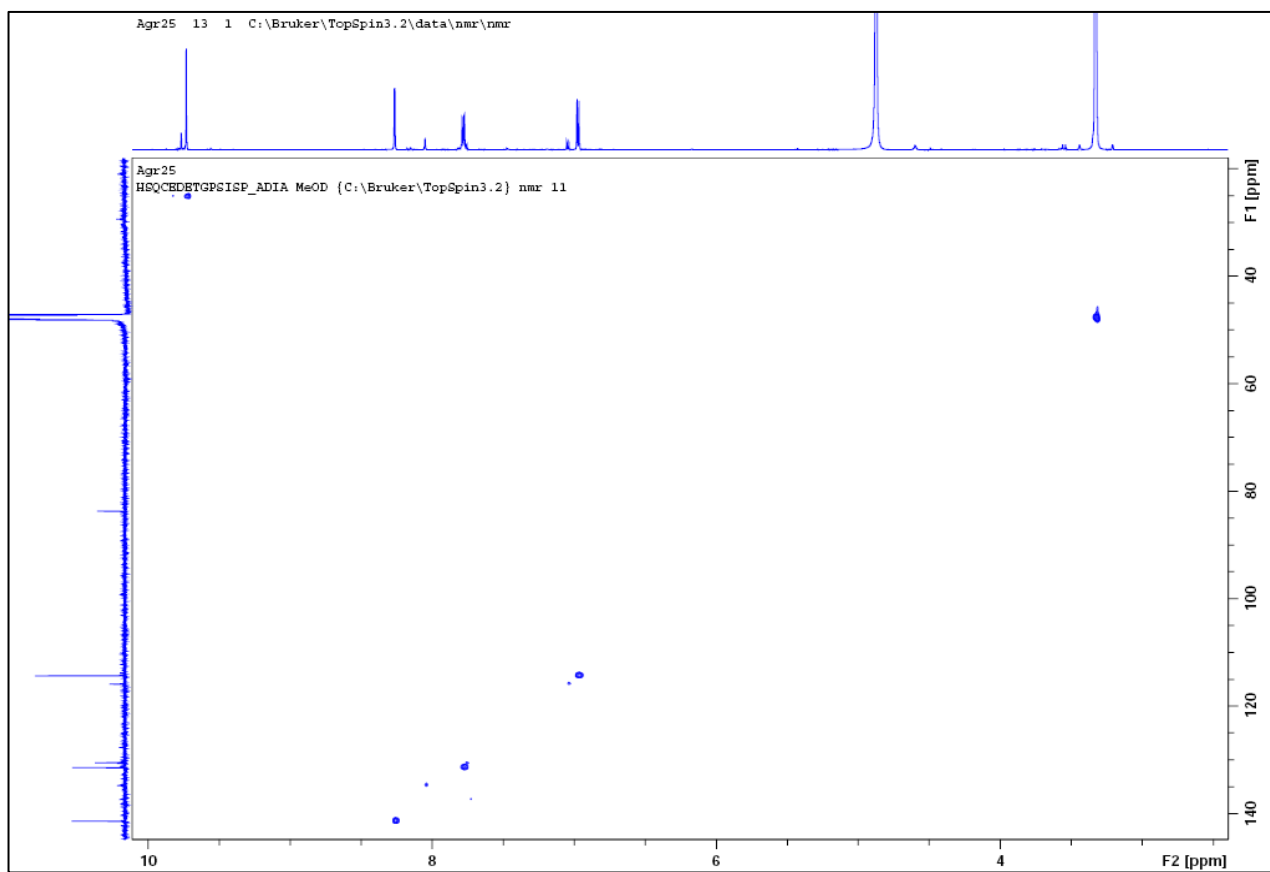

Fig. S11: HSQC NMR spectrum of compound **2** in CD<sub>3</sub>OD

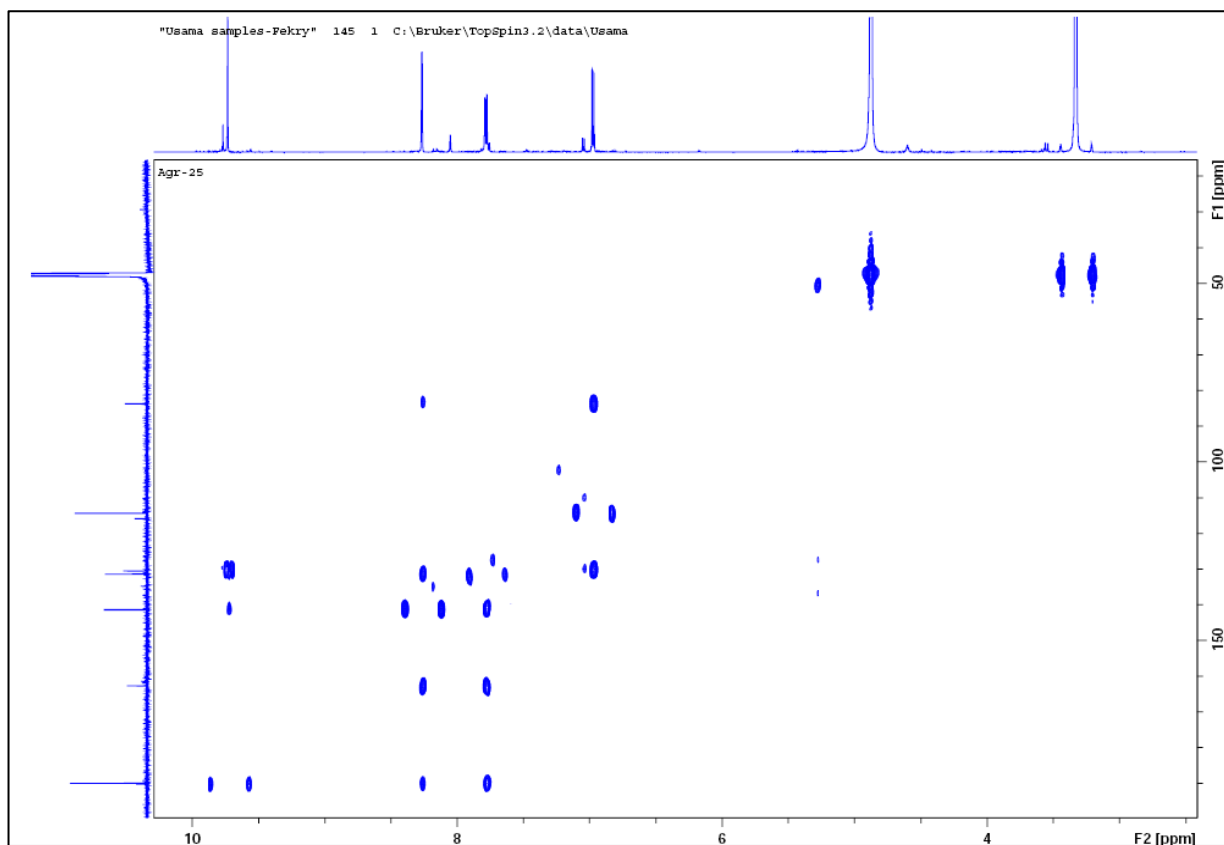

Fig. S12: HMBC NMR spectrum of compound **2** in CD<sub>3</sub>OD



lamiaa-agr25 #10 RT: 0.18 AV: 1 SB: 2 4.55, 4.59 NL: 1.67E5  
T: {0,0} + c EI Full ms [40.00-1000.00]

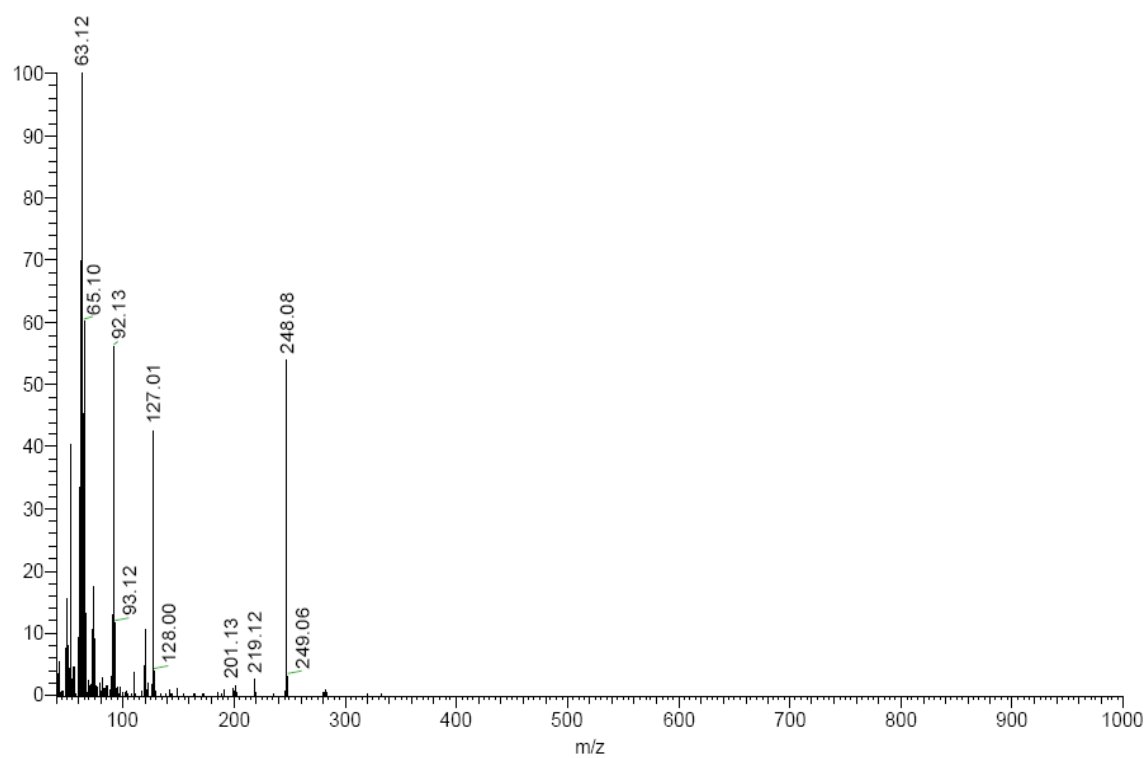

**Fig. S13:** EI-MS spectrum of compound **2**

### Compound 3

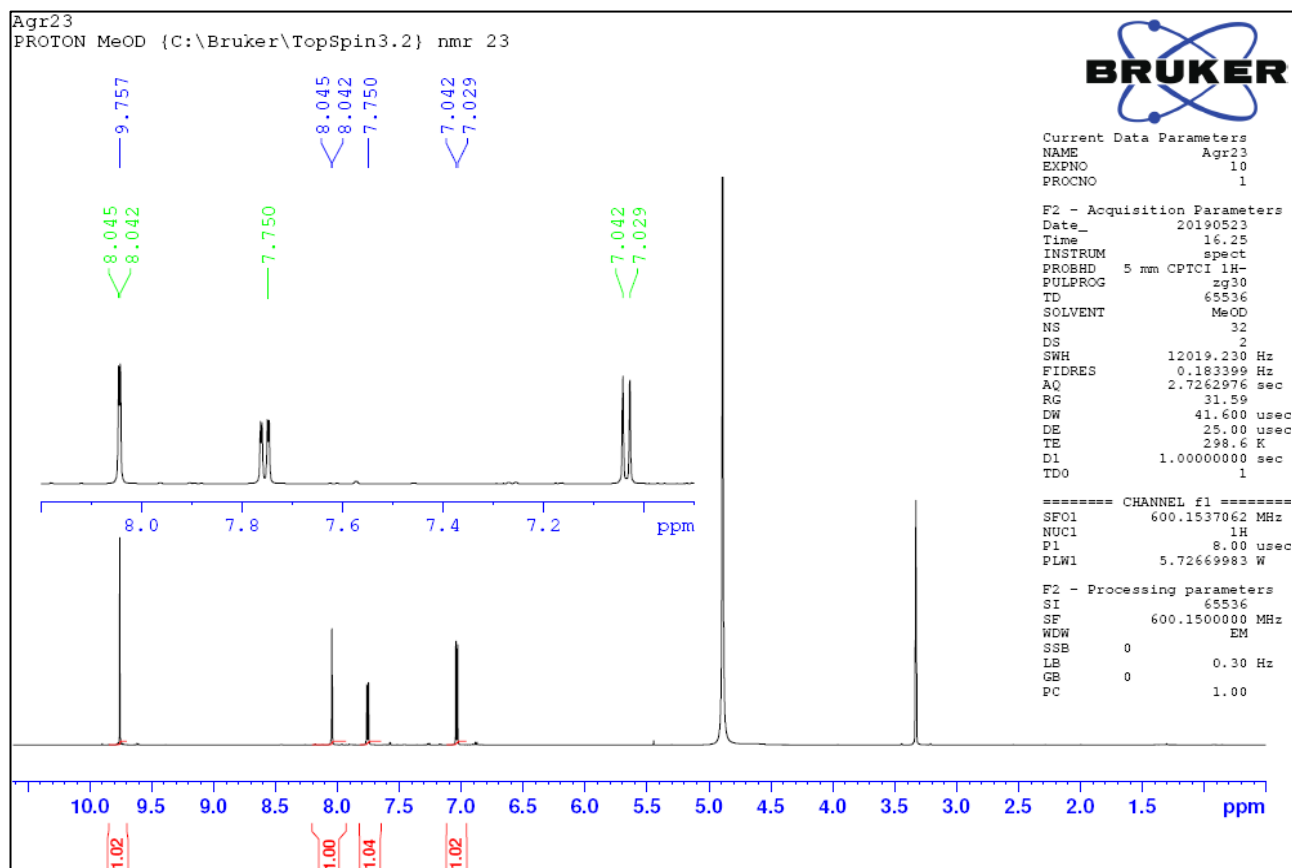

Fig. S14:  $^1\text{H}$  NMR spectrum of compound 3 in  $\text{CD}_3\text{OD}$

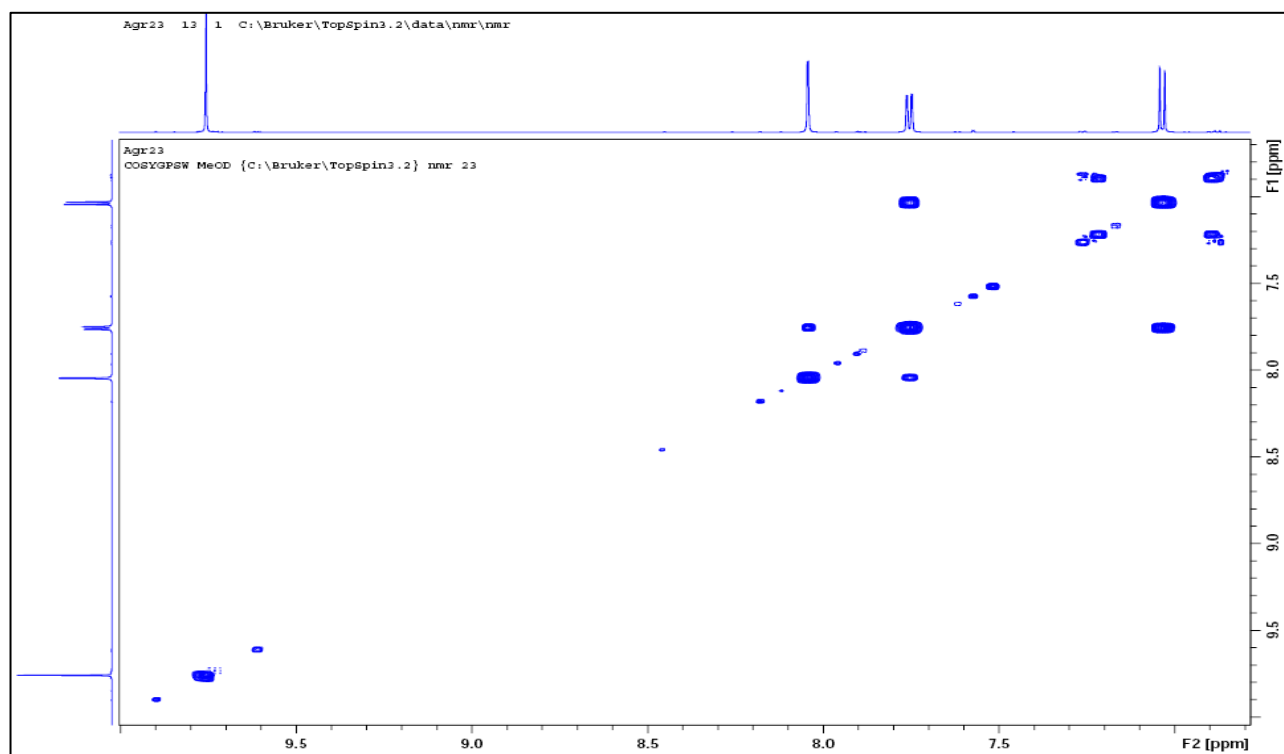

Fig. S15: HH-COSY NMR spectrum of compound 3 in  $\text{CD}_3\text{OD}$

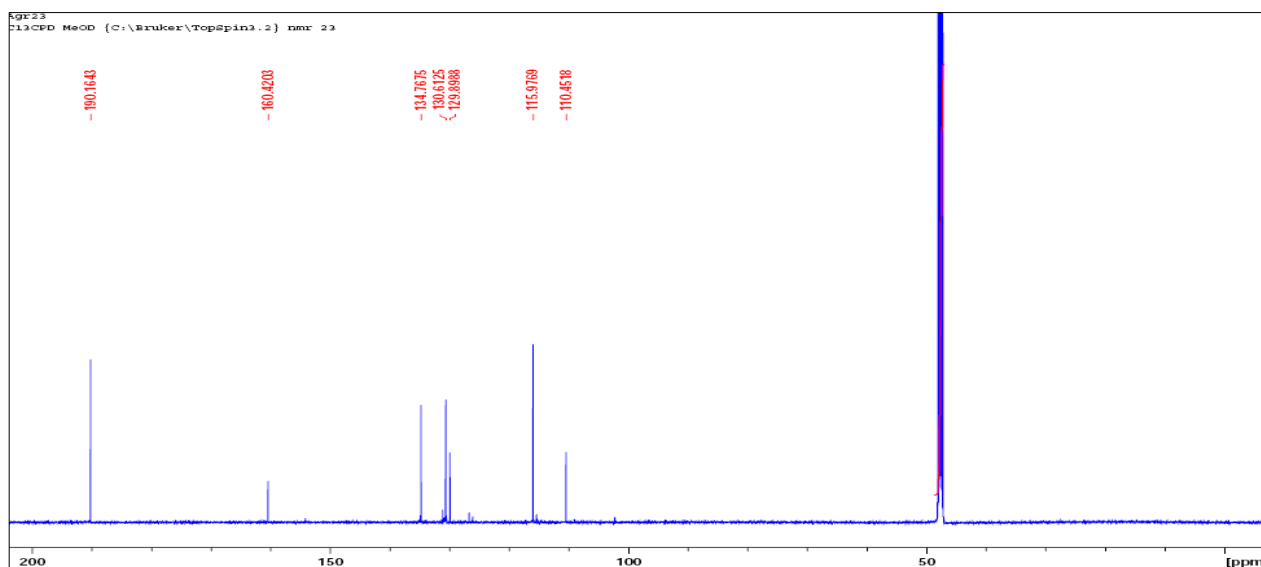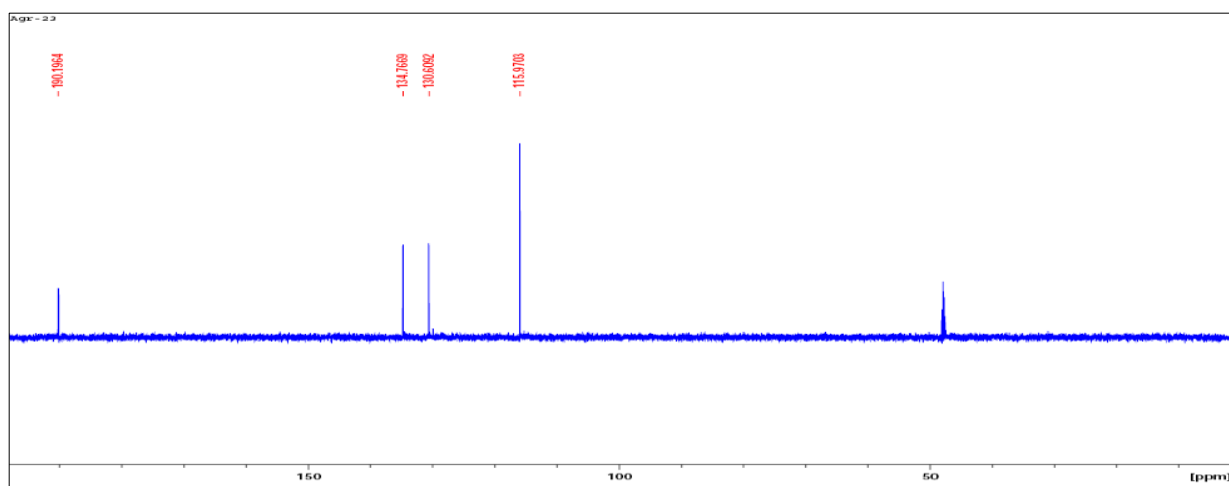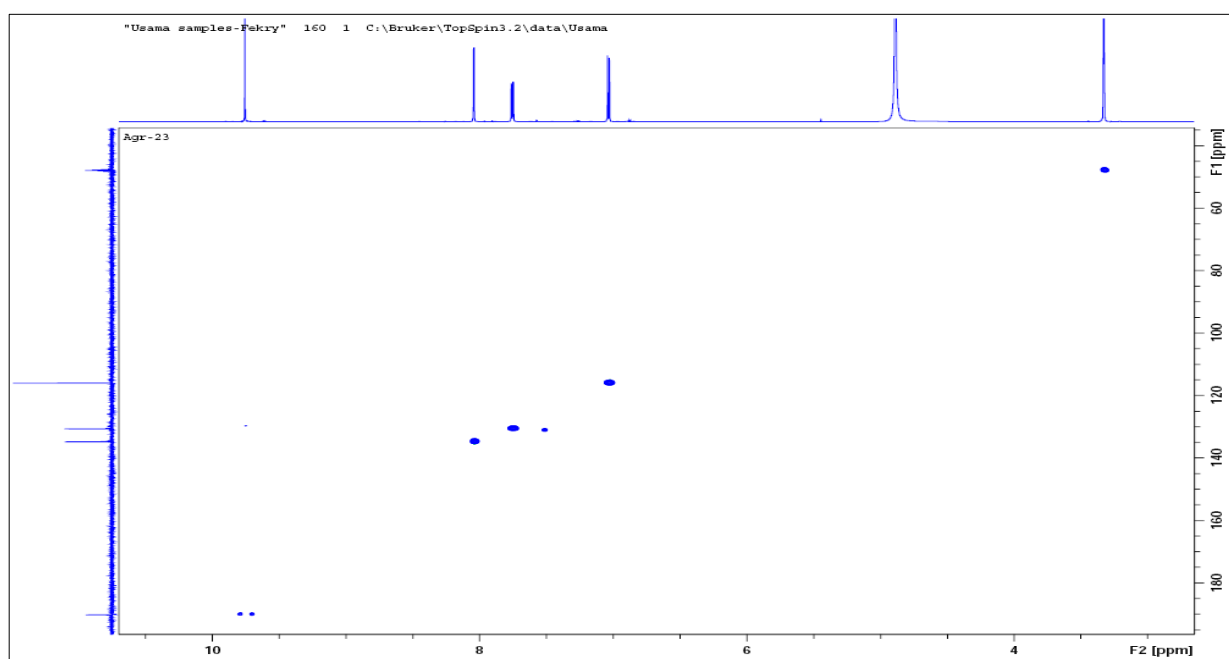

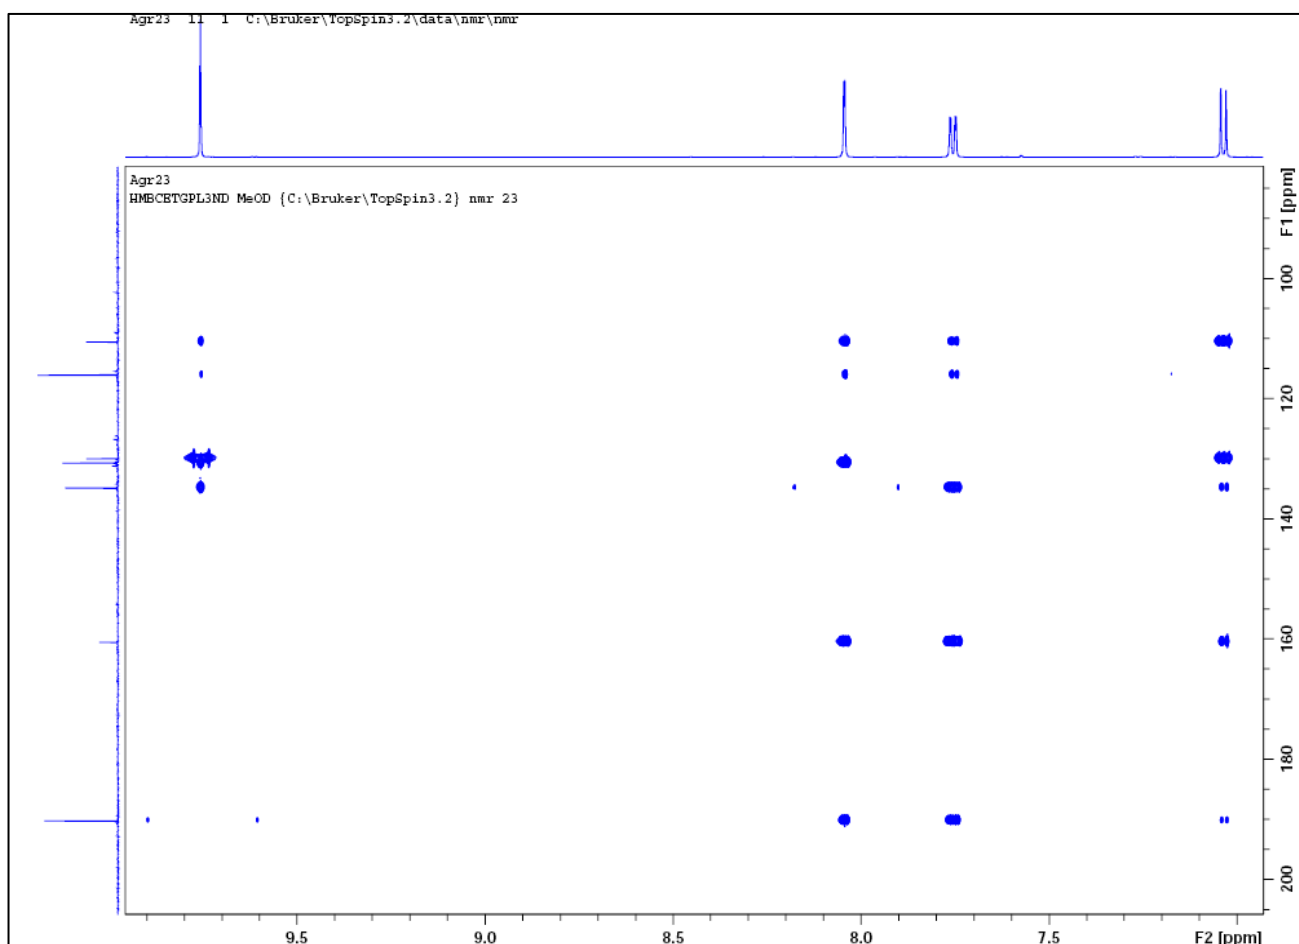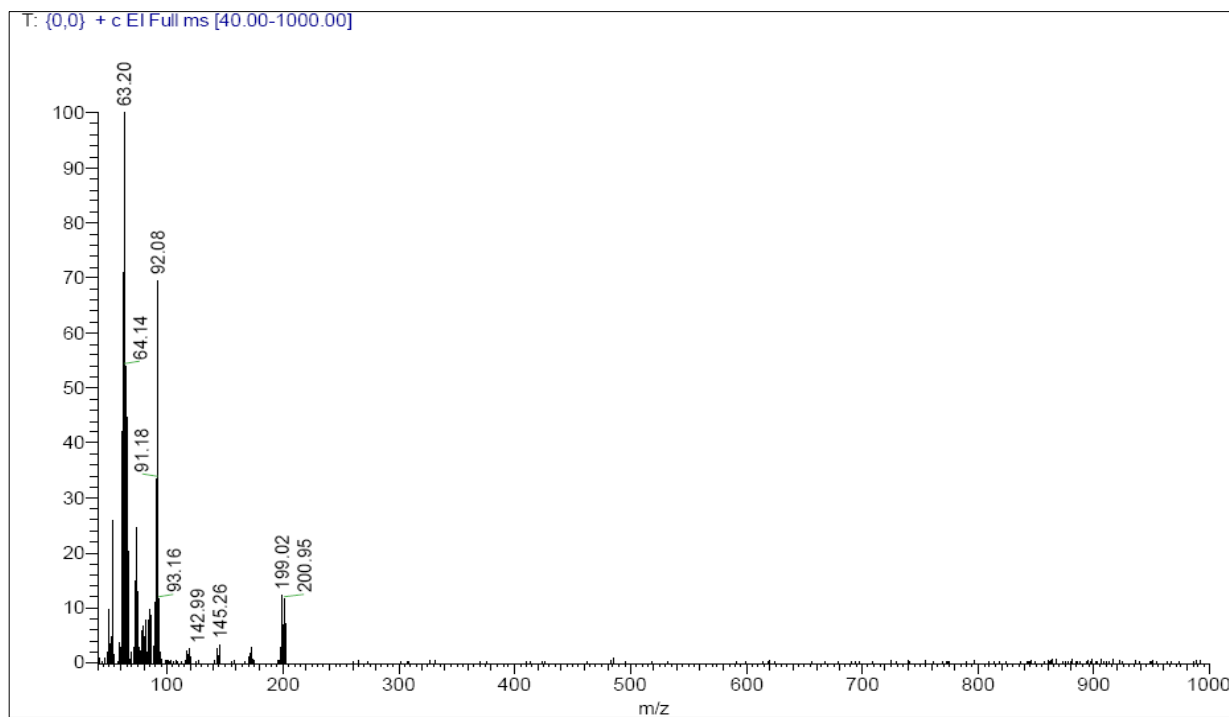

Supplement: Supplementary file 1 [file j_znc-2020-0221_suppl.pdf]
